# Supplementary material
Source: PubMed Central journal article supplement (PMC6866913)
Supplement: HBM-38-3878-s001.pdf [file HBM-38-3878-s001.pdf]

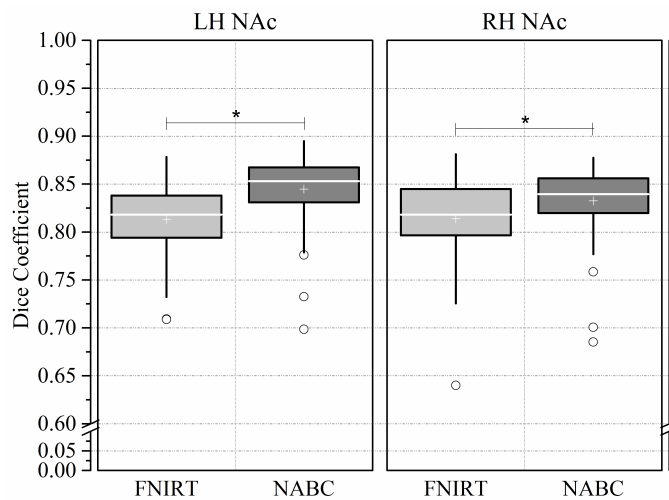

Figure 1 (Width: 3.5 inches; 1200 DPI)

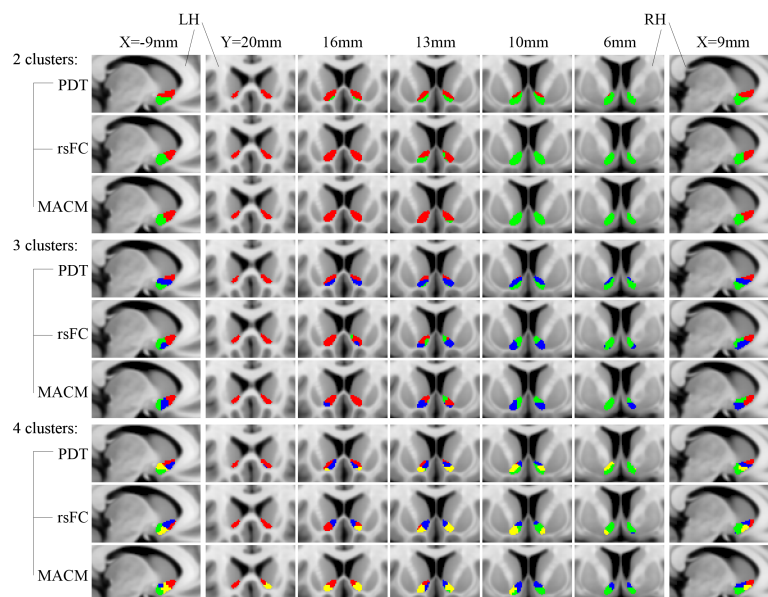

Figure 2 (Width: 6.5 inches; 600 DPI)

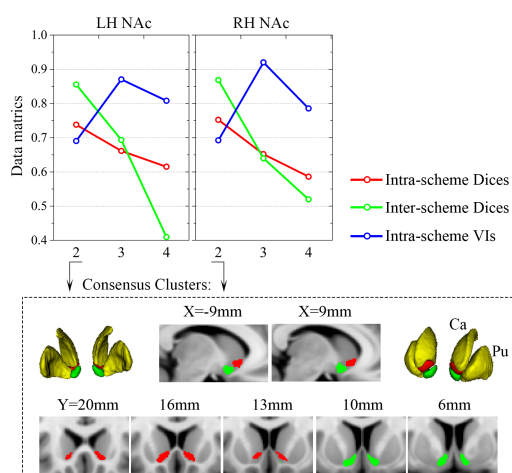

Figure 3 (Width: 3.5 inches; 600 DPI)

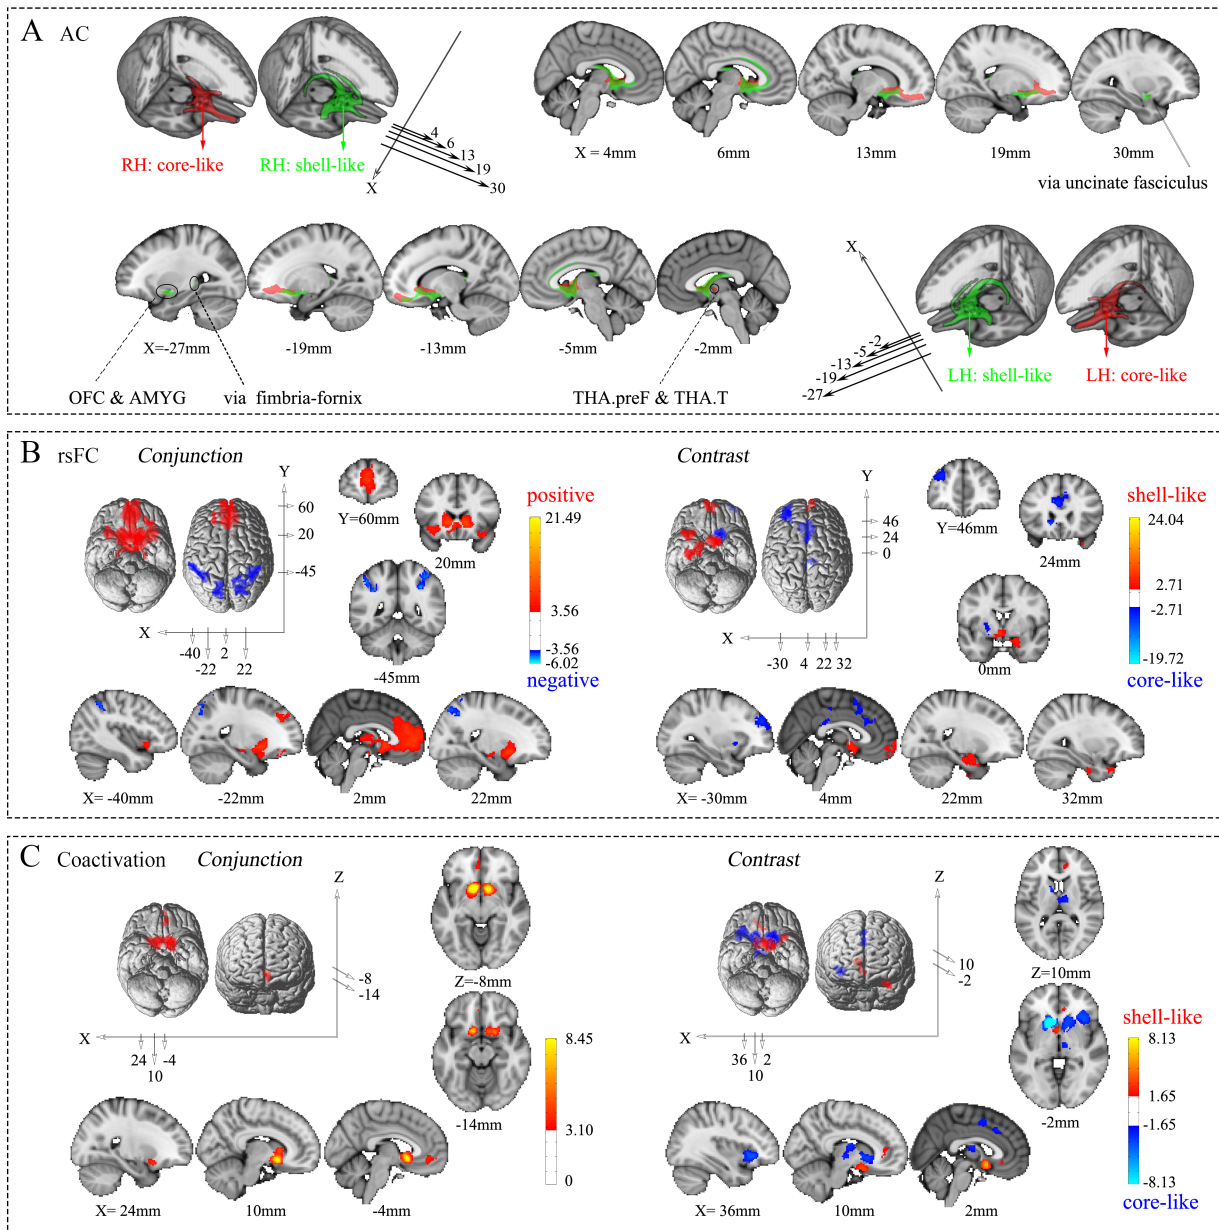

Figure 4 (Width: 6.5 inches; 600 DPI)

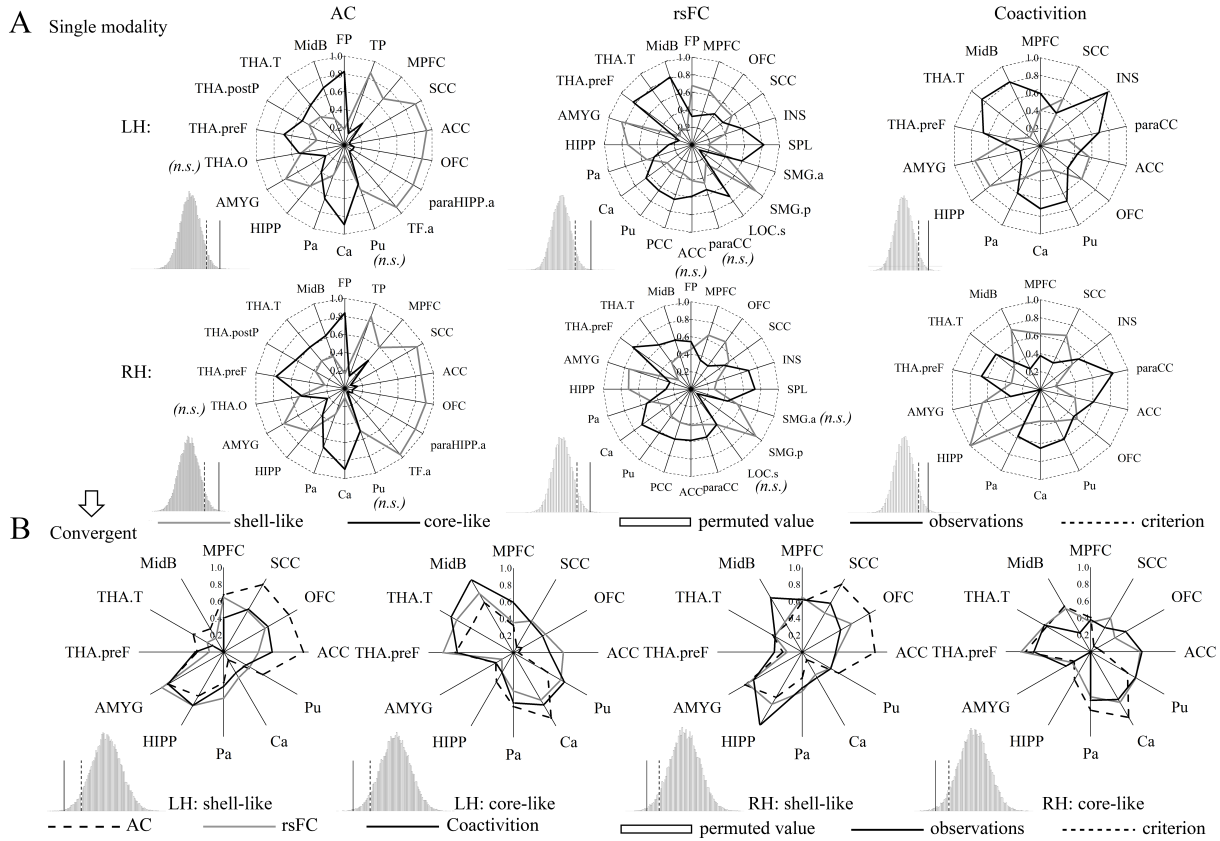

Figure 5 (Width: 6.5 inches; 1200 DPI)

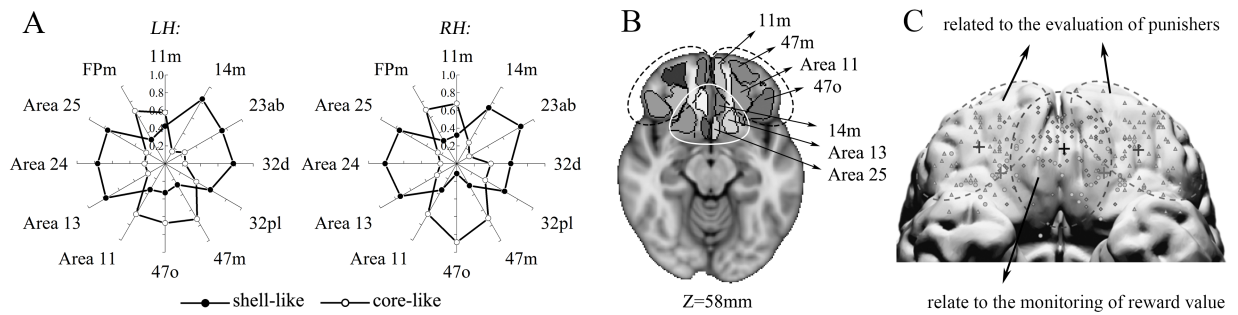

Figure 6 (Width: 6.5 inches; 600 DPI)

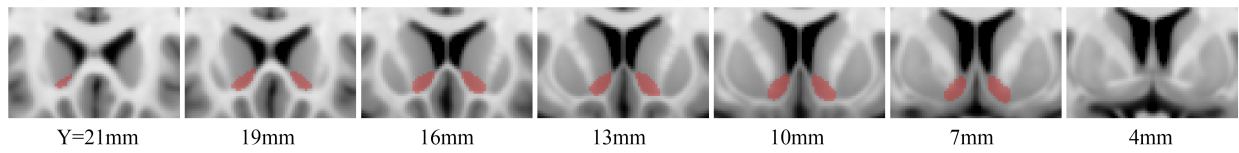

Figure S1 (Width: 6.5 inches; 600 DPI)

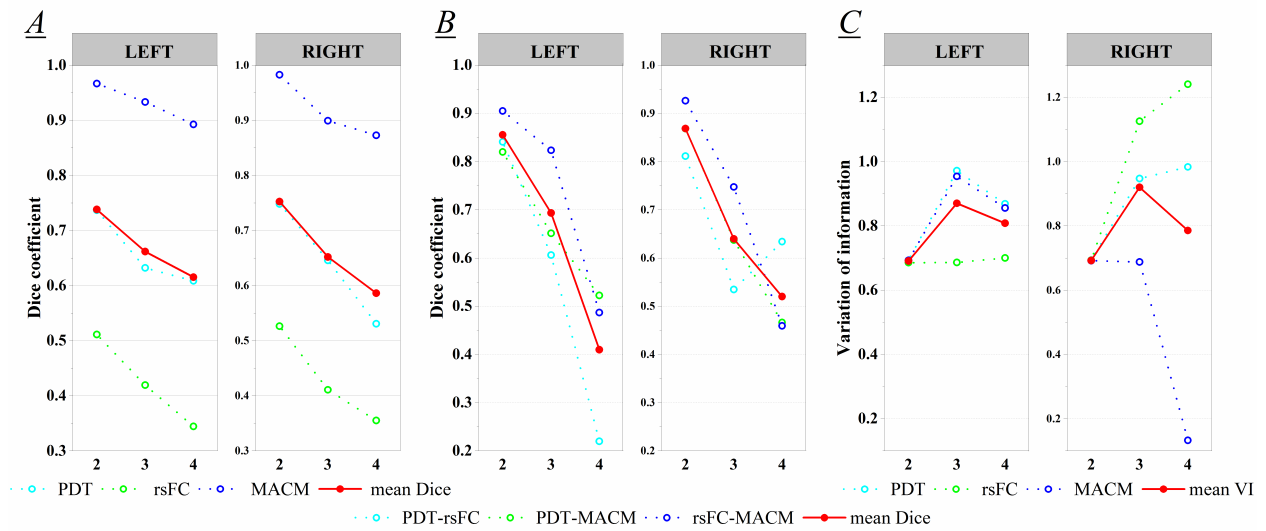

Figure S2 (Width: 6.5 inches; 1200 DPI)

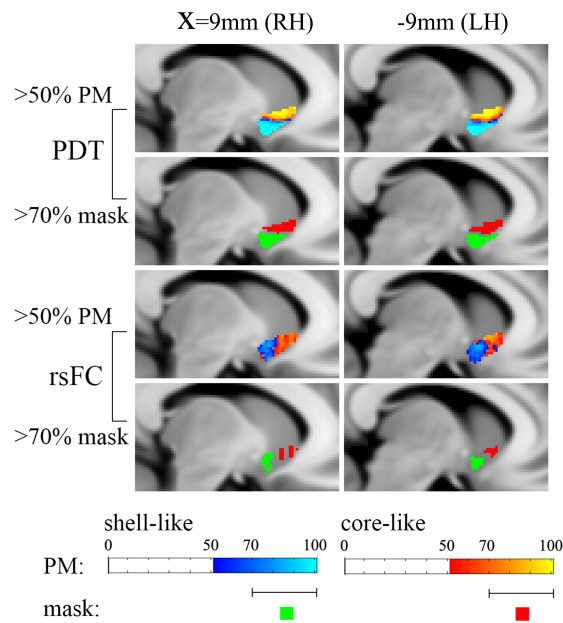

Figure S3 (Width: 6.5 inches; 600 DPI)

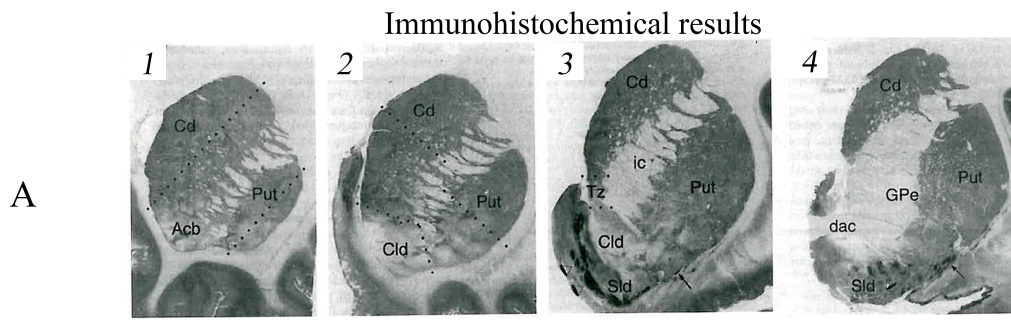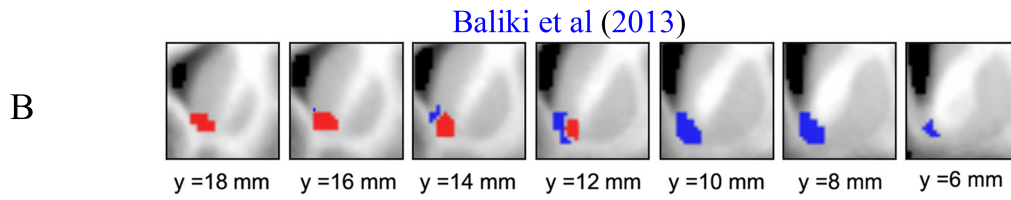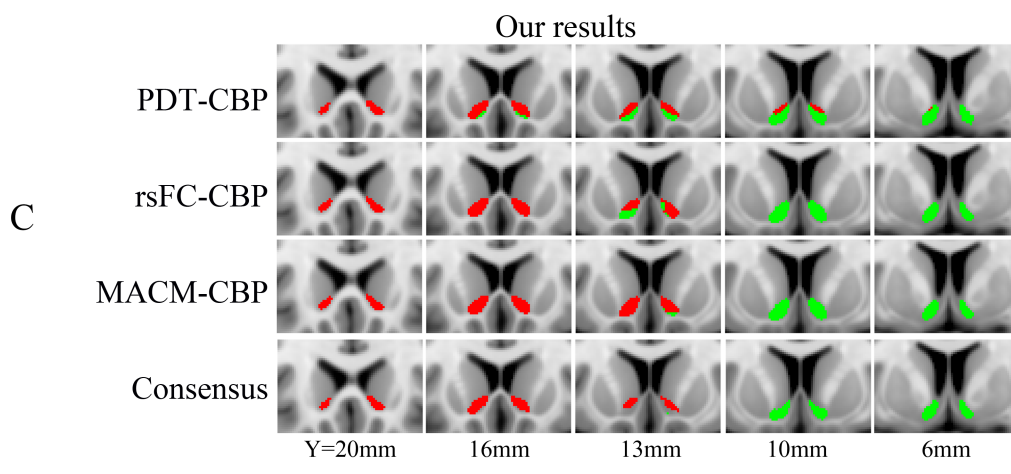

Figure S4 (Width: 6.5 inches; 600 DPI)

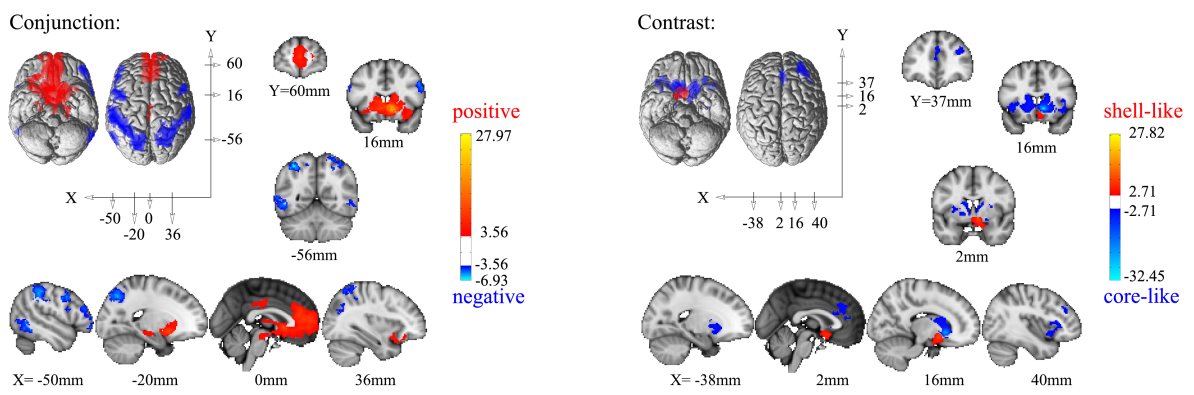

Figure S5 (Width: 6.5 inches; 600 DPI)

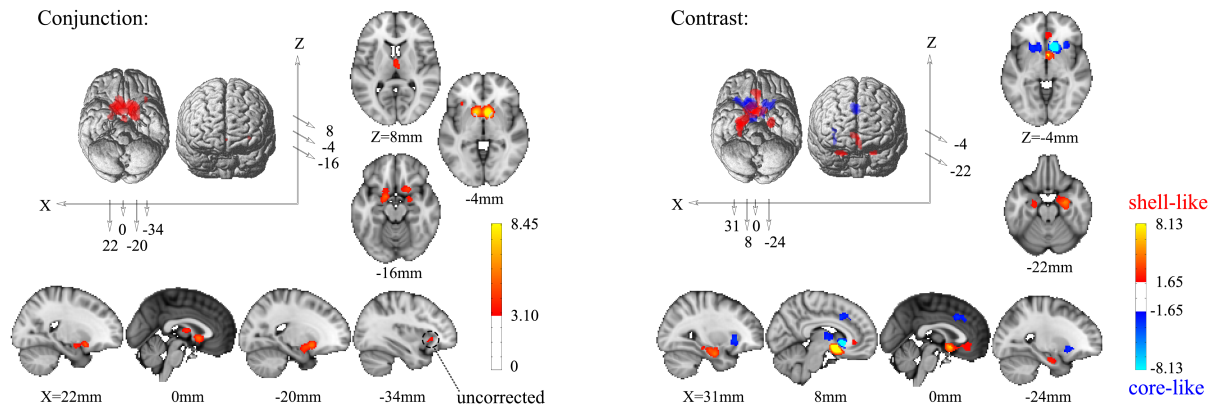

Figure S6 (Width: 6.5 inches; 600 DPI)

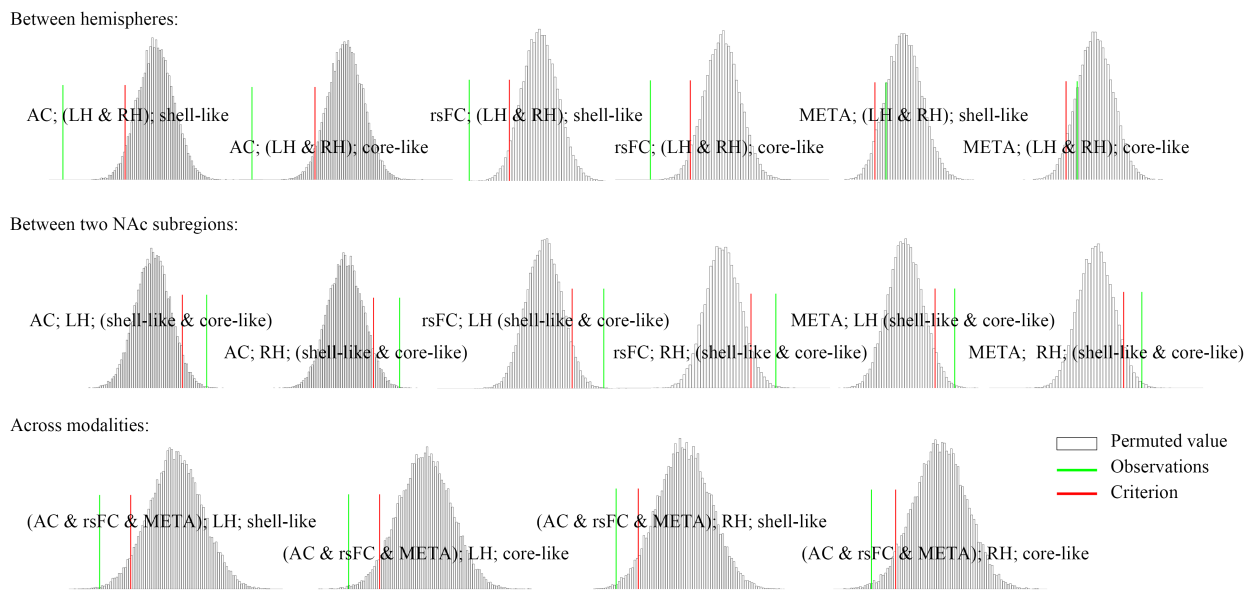

Figure S7 (Width: 6.5 inches; 600 DPI)
